# Supplementary material for: A T-cell receptor escape channel allows broad T-cell response to CD1b and membrane phospholipids
Source: PubMed Central journal article supplement (PMC6320368; doi:10.1038/s41467-018-07898-0), 2019-01-04
Supplement: 41467_2018_7898_MOESM1_ESM.pdf [file 41467_2018_7898_MOESM1_ESM.pdf]

Supplementary information

A T cell receptor escape channel allows broad T cell response to CD1b and membrane phospholipids

by Shahine et al.

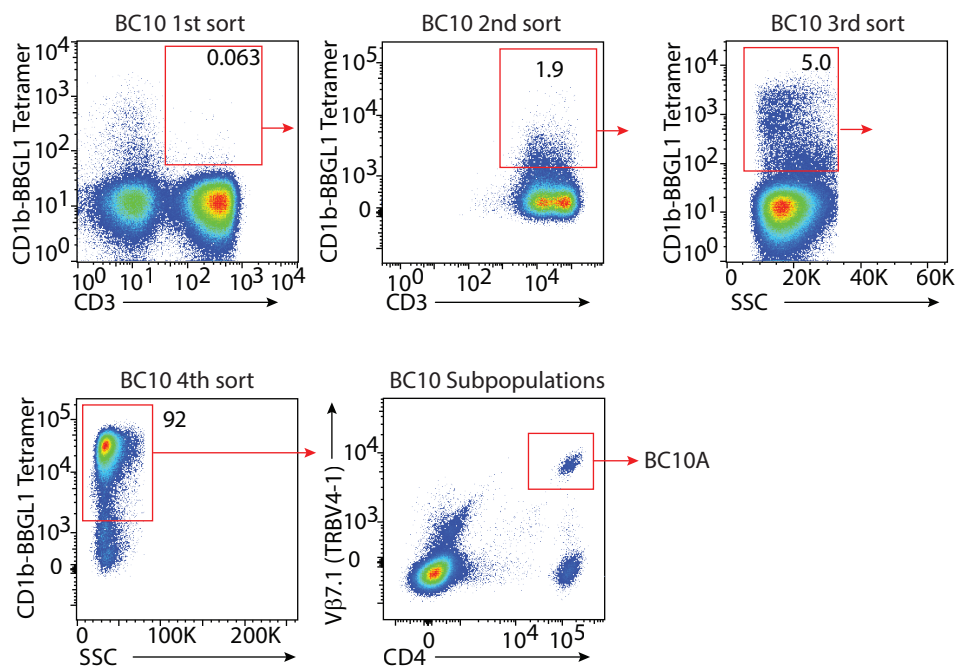

**Supplementary Figure 1. Generation of a CD1b-specific cell line from buffy coat 10 (BC10).** After four rounds of sorting based on CD1b tetramers treated with BBGL1 lipid, each followed by 14 days of expansion based on stimulation with an antibody against CD3 and irradiated allogeneic feeder cells, cells were gated based on expression of CD4 and TRBV4-1.

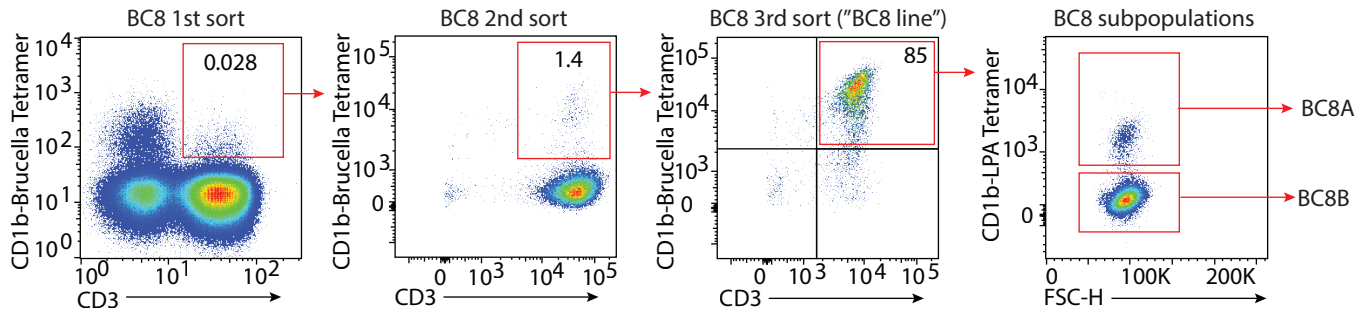

**Supplementary Figure 2. Generation of a CD1b-specific cell line from buffy coat 8 (BC8).** After two rounds of sorting based on CD1b tetramers treated with *Brucella melitensis* lipid extract, each followed by 14 days of expansion based on stimulation with an antibody against CD3 and irradiated allogeneic feeder cells, a third round of sorting was based on binding to CD1b tetramers treated with LPA.

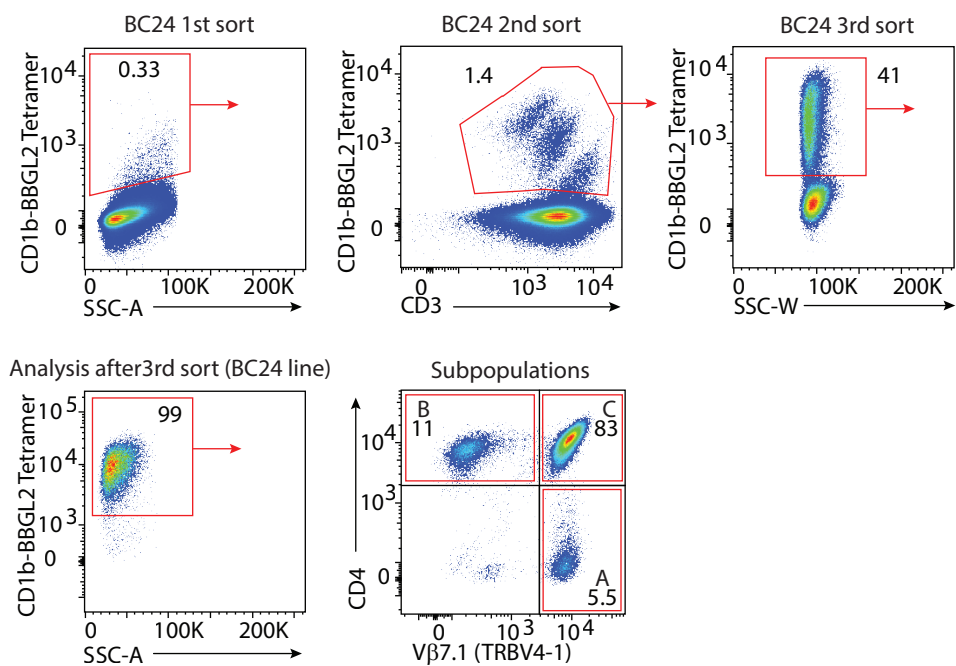

**Supplementary Figure 3. Generation of a CD1b-specific cell line from buffy coat 24 (BC24).** After three rounds of sorting based on CD1b tetramers treated with synthetic *Borrelia burgdorferi* glycolipid 2 (BBGL2) lipid, each followed by 14 days of expansion based on stimulation with an antibody against CD3 and irradiated allogeneic feeder cells, subpopulations A, B, and C were gated based on expression of CD4 and TRBV4-1.

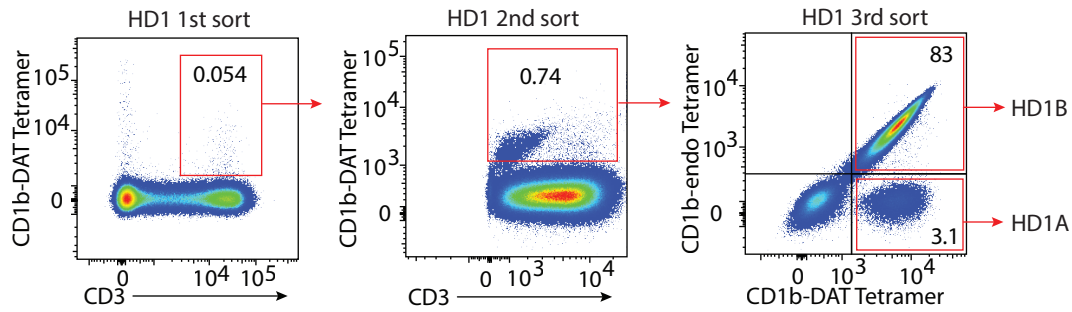

**Supplementary Figure 4: Generation of a CD1b-specific cell line from healthy donor 1 (HD1).** After two rounds of sorting based on CD1b tetramers treated with synthetic diacyltrehalose (DAT), each followed by 14 days of expansion based on stimulation with an antibody against CD3 and irradiated allogeneic feeder cells, a third round of sorting was based on binding to CD1b-endo tetramers or DAT-treated tetramers. The two subpopulations are named HD1A and HD1B.

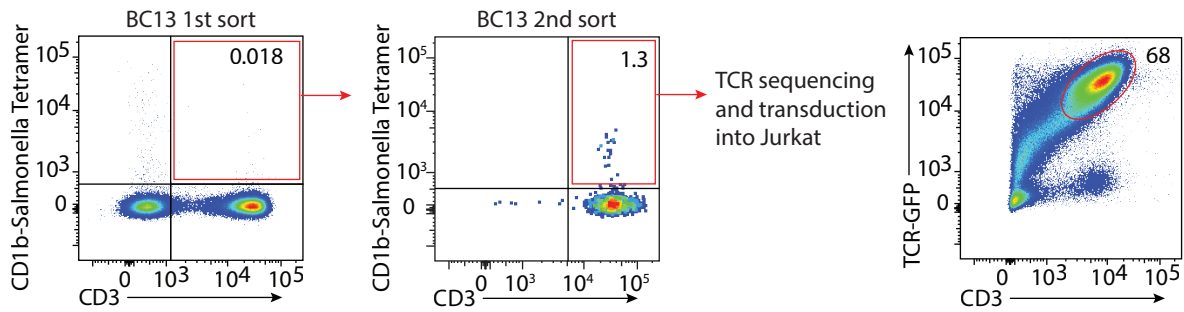

**Supplementary Figure 5. Generation of a CD1b-specific cell line from buffy coat 13**

**(BC13).** After two rounds of sorting based on CD1b tetramers treated with *Salmonella typhimurium* lipid extract, each followed by 14 days of expansion based on stimulation with an antibody against CD3 and irradiated allogeneic feeder cells, a third round of sorting was performed to obtain single cell TCR sequences. The obtained TCR was cloned into a viral construct that also encodes GFP and used to transduce Jurkat76 cells.

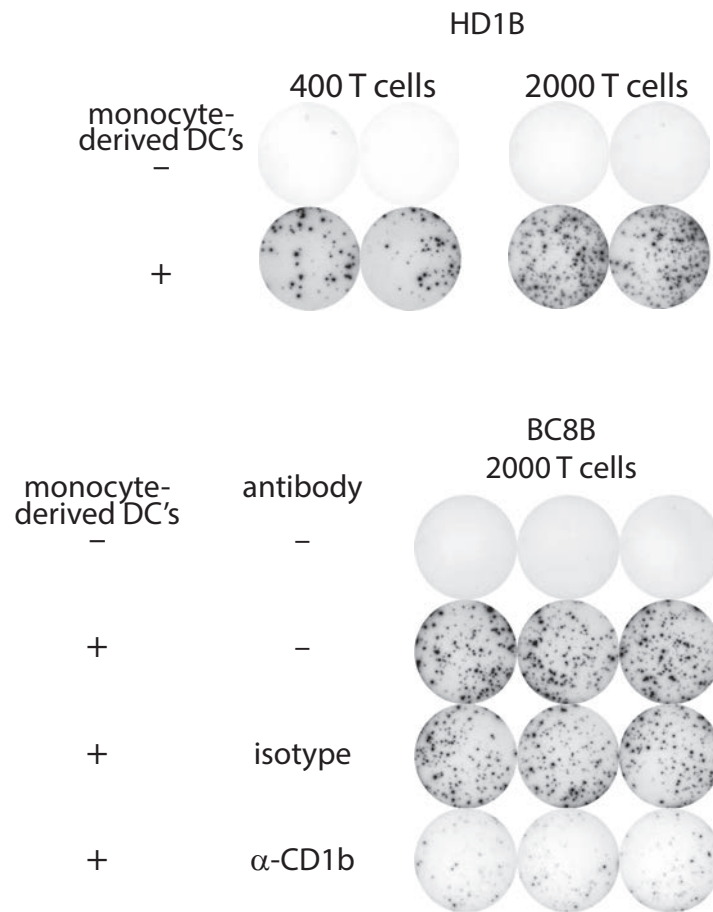

**Supplementary Figure 6. Monocyte-derived dendritic cells stimulate CD1b-specific T cell lines.** IFN- $\gamma$  ELISPOT assay of T cell lines HD1B and BC8B cells stimulated with human monocyte-derived dendritic cells that were prepared from primary monocytes. The ELISPOT was performed without the addition of exogenous antigen.

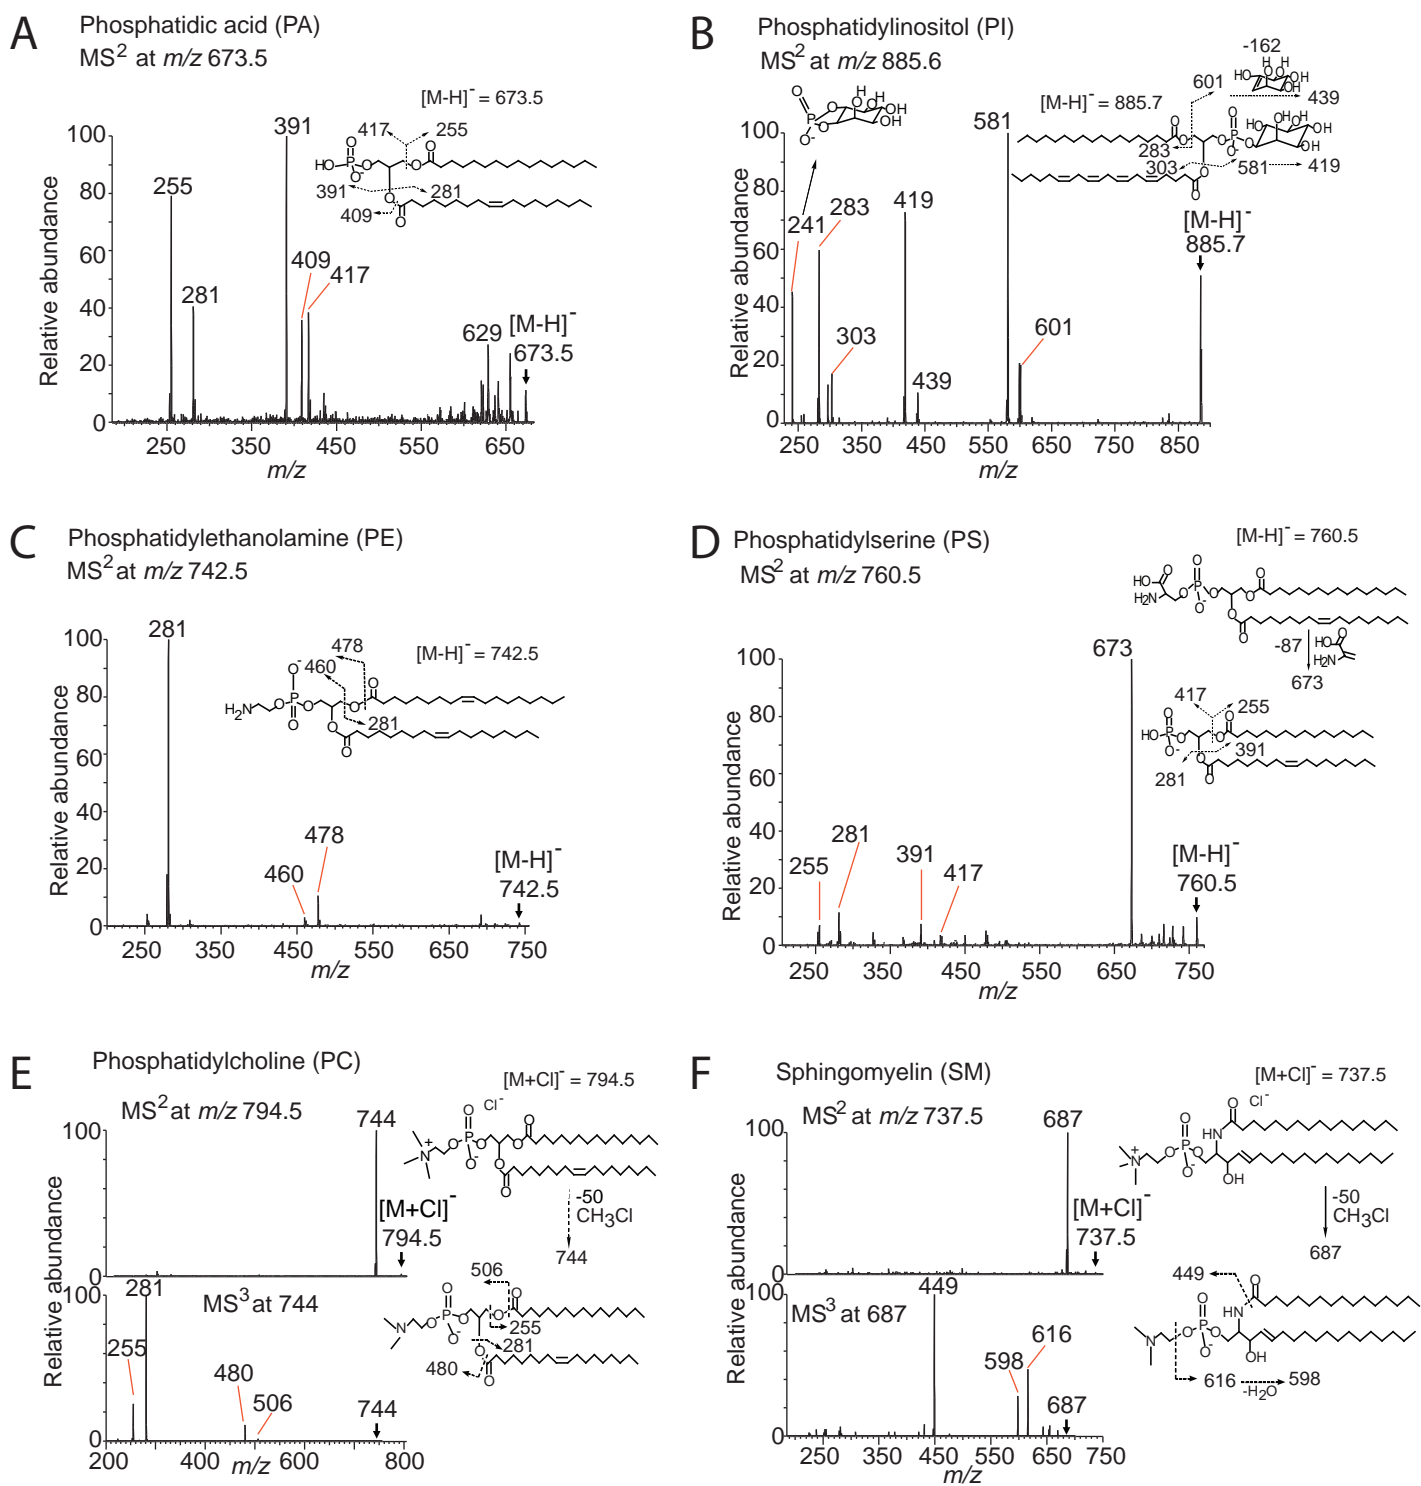

**Supplementary Figure 7. Low resolution mass spectrometry of CD1b-endo-bound lipids.** Identification of self-lipids eluted from CD1b-endo by negative mode nano-electrospray ionization collision-induced dissociation mass spectrometry (CID-MS). This figure supports the assignments in Fig. 2a.



phosphatidylcholine  
(PC)

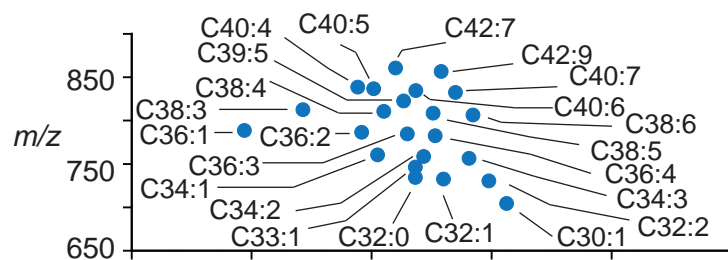

sphingomyelin  
(SM)

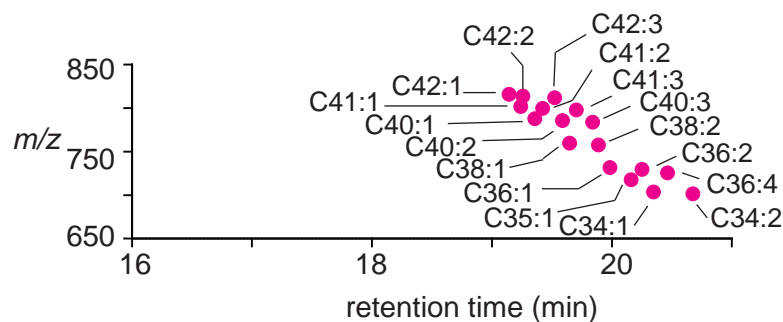

**Supplementary Figure 8. High resolution mass spectrometry of CD1b-en-**  
**do-bound lipids.** CD1b eluents were analyzed by quadrupole time of flight  
(Q-ToF) HPLC-MS. The lipid identities of phosphatidylcholine (PC) and sphingo-  
myelin (SM), were determined based on the accurate mass and the retention  
time matching those of the lipid standards. Chain length and saturation variants  
within the same lipid class typically have similar retention times and  $m/z$  values  
and thus appear as clusters. Delineation of PC (blue) and SM (pink) as 22 and 17  
molecular species, respectively, presented as 'CX:Y', where 'X' is the total number  
of carbon (C) atoms in the combined fatty acyl and sphingosine units and 'Y' is  
the total number of unsaturations.

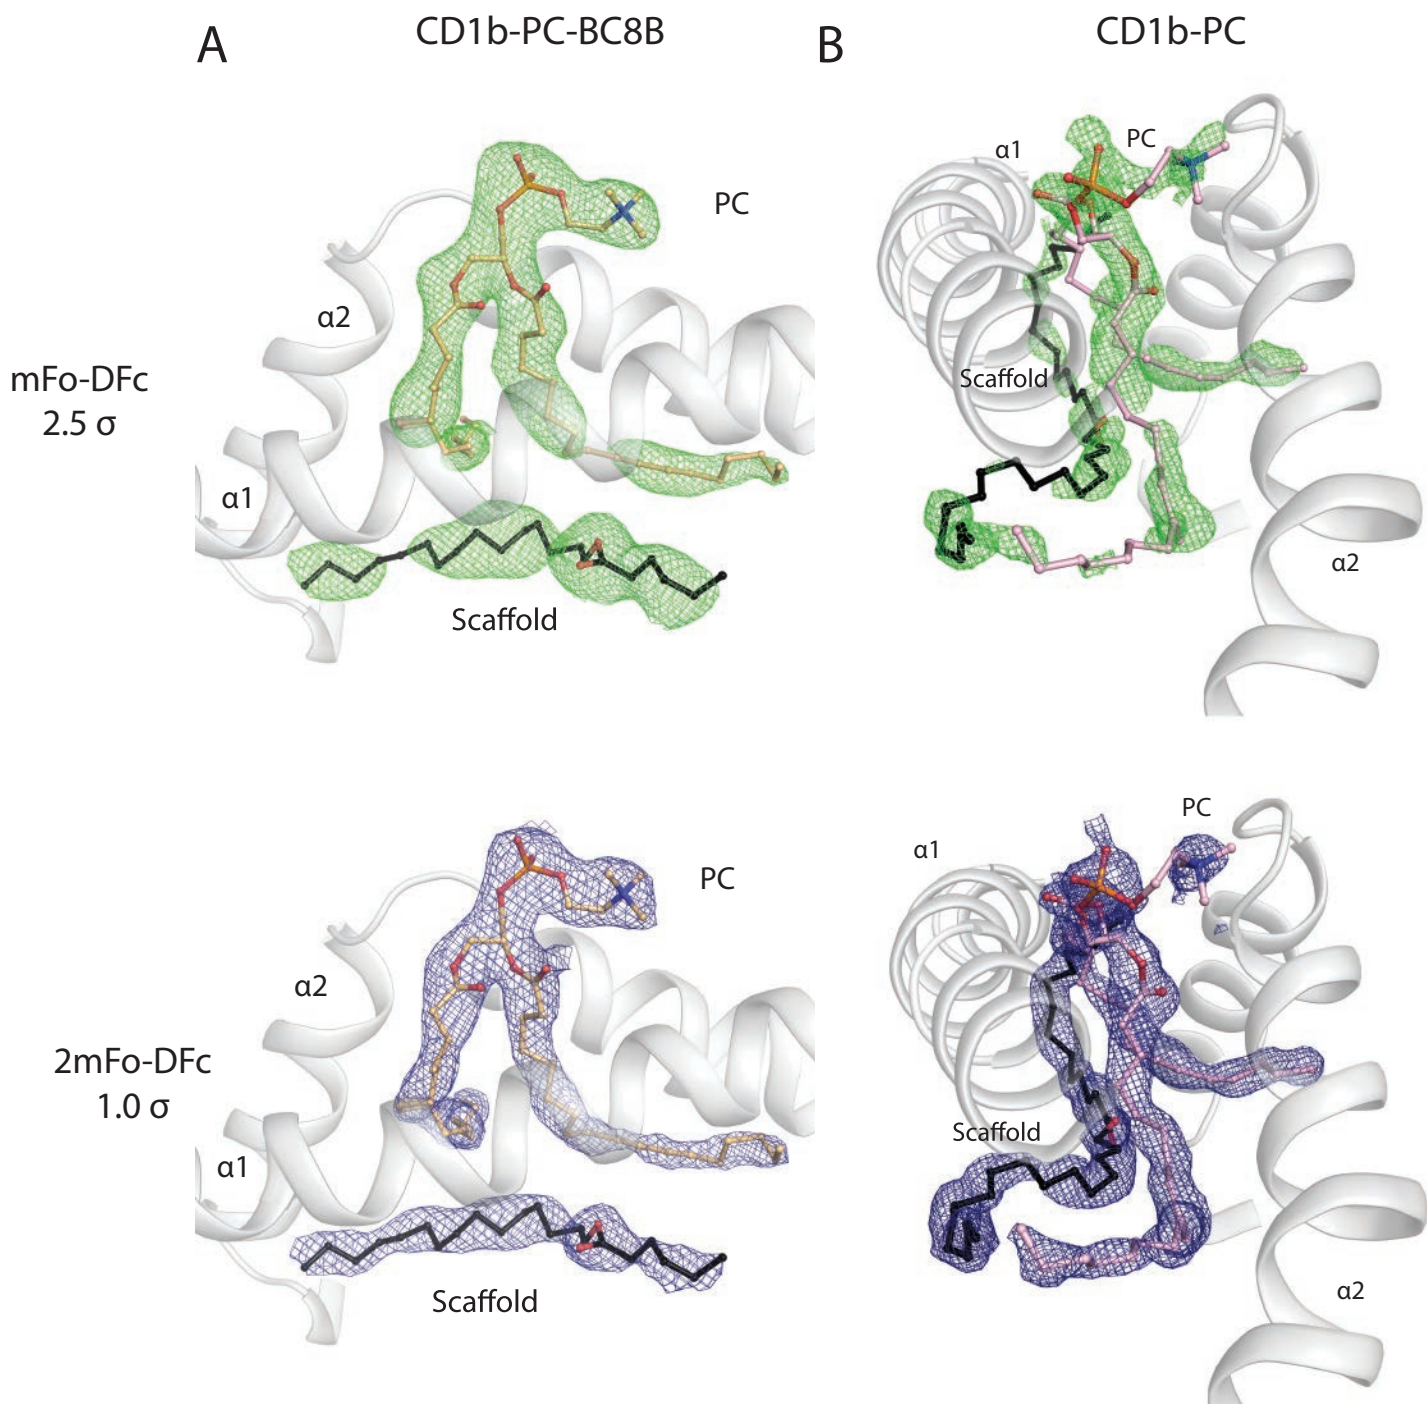

**Supplementary Figure 9. Lipid electron density maps.** Lipids bound within the antigen binding cleft of CD1b as observed in the crystal structure of (A) the CD1b-PC-BC8B complex, and (B) the CD1b-PC complex. Lipids presented as stick representation, with PC colored A) light orange, and B) pink, with the scaffold lipid colored black. Oxygen, nitrogen and phosphorus are coloured red, blue and orange respectively. Electron density maps are contoured around the lipids within the antigen binding grooves. Omit density maps (mFo-DFc, upper) are coloured in green and contoured to 2.5  $\sigma$ , and refined density maps (2mFo-Fc, lower) are colored in blue and contoured to 1.0  $\sigma$ .

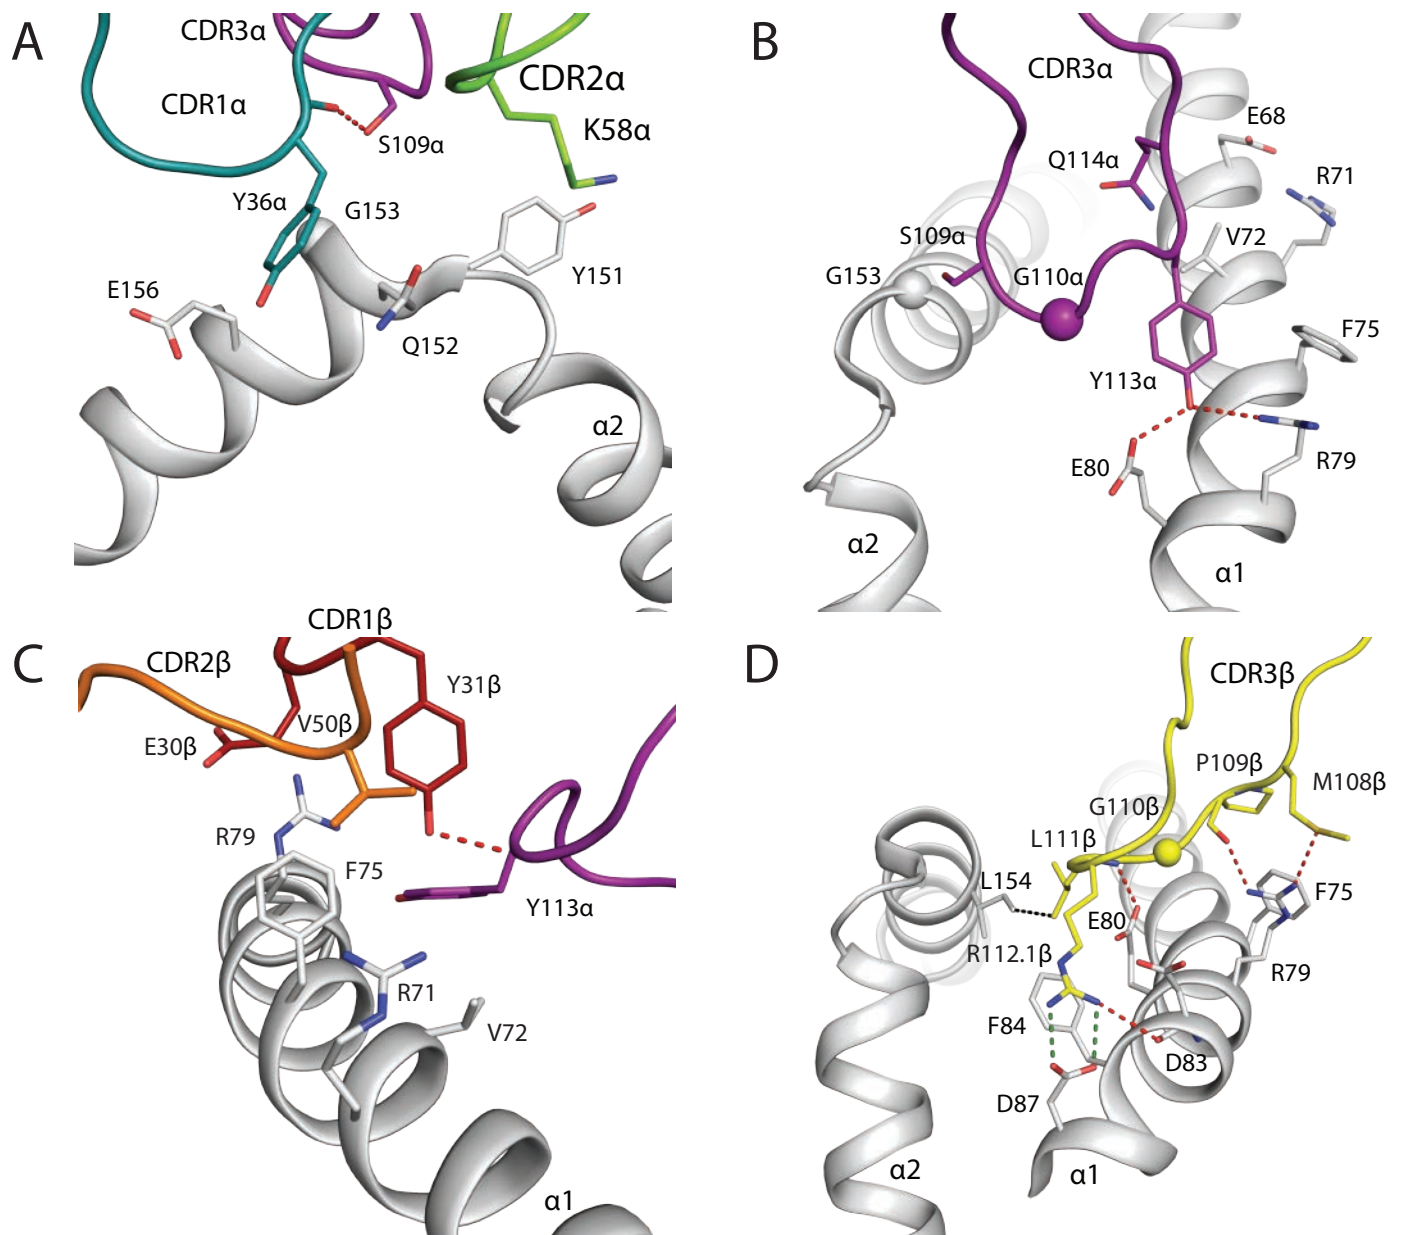

**Supplementary Figure 10. Contacts between CD1b and the BC8B TCR.** Amino acid contacts between CD1b (grey) and the BC8B TCR A) CDR1α (teal) and CDR2α (green), B) CDR3α (purple), C) CDR1β (red) and CDR2β (orange), and D) CDR3β (yellow) regions. CD1b and TCR backbones are represented as ribbons, with amino acid residues involved in contacts represented as sticks, with the exception of glycine residues, which are represented as spheres. Oxygen, nitrogen, and sulfur are represented in red, blue, and brown respectively. Hydrogen bonds, Salt Bridges, and hydrophobic interactions are represented as red, green, and black dashes respectively.

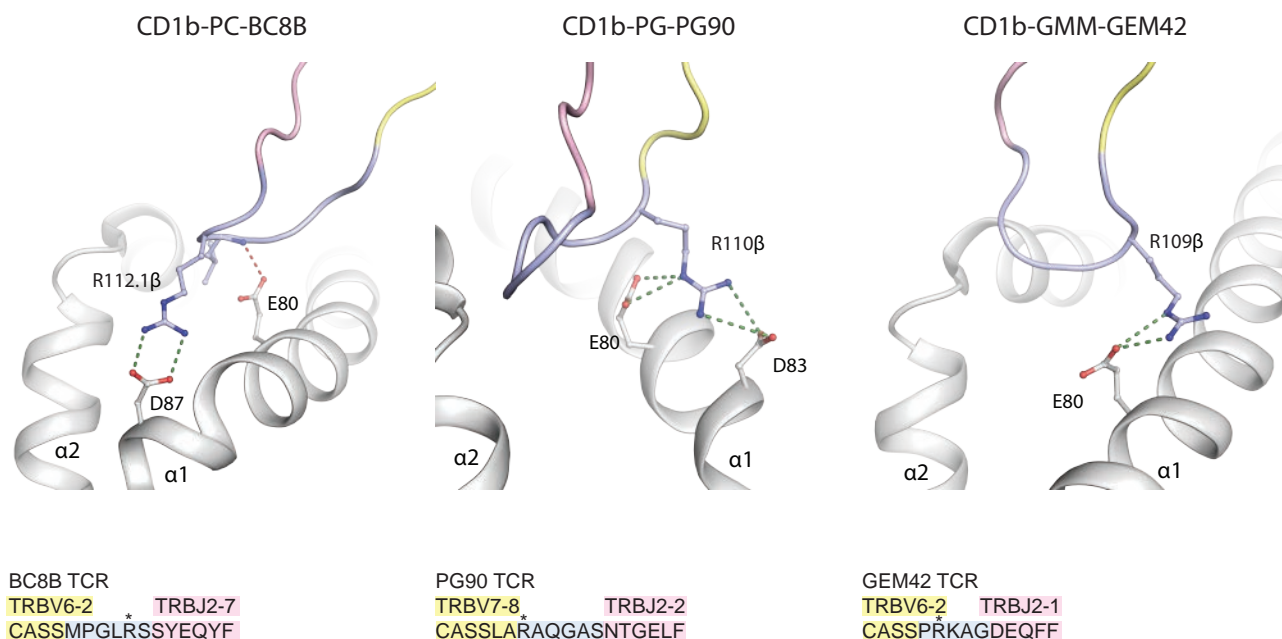

**Supplementary Figure 11. CDR3 $\beta$ -CD1b salt bridge contact comparison between the BC8B, PG90, and GEM42 TCRs.** The CDR3 $\beta$  regions encoded by variable (TRBV) (yellow), N addition (blue), and junction (TRBJ) (pink) regions, and CD1b (grey), are represented as ribbons. Amino acid residues involved in contacts are represented as sticks. Salt bridges and hydrogen bonds are indicated as green and red dashes respectively. (Lower) TCR $\beta$  gene usages for BC8B (TRBV6-2/TRBV2-7, left), PG90 (TRBV7-8/TRBV2-2, middle), and GEM42 (TRBV6-2/TRBV2-1, right) TCRs. Amino acid sequences encoded in the CDR3 regions are indicated, and color coded as above. N-region encoded arginine is indicated by asterisk (\*).

Supplementary Table 1: Data Collection and Refinement Statistics

|                                                         | <b>CD1b-PC-BC8B</b>                                                     | <b>CD1b-PC</b>                                                 | <b>BC8B TCR</b>                                                 |
|---------------------------------------------------------|-------------------------------------------------------------------------|----------------------------------------------------------------|-----------------------------------------------------------------|
| <b>Space Group</b>                                      | P 1 21 1                                                                | P 21 21 21                                                     | P 21 21 21                                                      |
| <b>Resolution Range (Å)</b>                             | 65.70 – 2.40 (2.53 – 2.40)                                              | 46.95 – 1.70 (1.73 – 1.70)                                     | 47.29 – 2.02 (2.07 – 2.02)                                      |
| <b>Cell Dimensions (Å, °)</b>                           | a=73.30, b=65.70, c=101.90<br>$\alpha = \gamma = 90.00, \beta = 100.70$ | a=57.98, b=80.03, c=92.77<br>$\alpha = \beta = \gamma = 90.00$ | a=49.62, b=76.88, c=119.95<br>$\alpha = \beta = \gamma = 90.00$ |
| <b>Total No. of reflections</b>                         | 538019 (78785)                                                          | 707553 (36798)                                                 | 210004 (15953)                                                  |
| <b>No. of unique reflections</b>                        | 37515 (5464)                                                            | 48143 (4719)                                                   | 30920 (2266)                                                    |
| <b>Multiplicity</b>                                     | 14.3 (14.4)                                                             | 14.7 (14.8)                                                    | 6.8 (7.0)                                                       |
| <b>Completeness (%)</b>                                 | 100.0 (100.0)                                                           | 99.9 (99.8)                                                    | 100.0 (100.0)                                                   |
| <b>CC (1/2)</b>                                         | 0.903 (0.500)                                                           | 0.999 (0.675)                                                  | 0.995 (0.802)                                                   |
| <b><math>R_{pim}</math> (%)<sup>a</sup></b>             | 17.8 (46.5)                                                             | 4.4 (62.9)                                                     | 6.0 (60.1)                                                      |
| <b>Mean <math>I/\sigma(I)</math><sup>b</sup></b>        | 5.2 (2.0)                                                               | 17.7 (1.9)                                                     | 9.1 (2.0)                                                       |
| <b><math>R_{factor}/R_{free}</math> (%)<sup>c</sup></b> | 20.9/21.9                                                               | 17.9/20.9                                                      | 21.0/22.8                                                       |
| <b>Non-hydrogen atoms</b>                               | 6820                                                                    | 3933                                                           | 3497                                                            |
| <b>Macromolecules</b>                                   | 6303                                                                    | 3094                                                           | 3294                                                            |
| <b>Ligands</b>                                          | 103                                                                     | 301                                                            | 16                                                              |
| <b>Water</b>                                            | 418                                                                     | 539                                                            | 187                                                             |
| <b>Protein Residues</b>                                 | 803                                                                     | 382                                                            | 427                                                             |
| <b>R.M.S.D. from ideality</b>                           |                                                                         |                                                                |                                                                 |
| <b>Bond Length (Å)</b>                                  | 0.007                                                                   | 0.008                                                          | 0.009                                                           |
| <b>Bond Angles (°)</b>                                  | 1.050                                                                   | 1.053                                                          | 1.100                                                           |
| <b>Ramachandran Plot</b>                                |                                                                         |                                                                |                                                                 |
| <b>Favoured Region (%)</b>                              | 97.97                                                                   | 99.74                                                          | 97.10                                                           |
| <b>Allowed Region (%)</b>                               | 1.90                                                                    | 0.26                                                           | 2.90                                                            |
| <b>Outliers (%)</b>                                     | 0.13                                                                    | 0.00                                                           | 0.00                                                            |
| <b>B-Factors (Å<sup>2</sup>)</b>                        |                                                                         |                                                                |                                                                 |
| <b>Average B-factors</b>                                | 31.96                                                                   | 27.92                                                          | 53.22                                                           |
| <b>Average Macromolecule</b>                            | 31.95                                                                   | 24.87                                                          | 53.12                                                           |
| <b>Average Ligand</b>                                   | 35.75                                                                   | 44.27                                                          | 72.40                                                           |
| <b>Average Water</b>                                    | 31.25                                                                   | 36.31                                                          | 53.29                                                           |
| <b>PDB Accession Code</b>                               | 6CUG                                                                    | 6D64                                                           | 6CUH                                                            |

<sup>a</sup> $R_{pim} = \sum_{hkl} [1/(N - 1)]^{1/2} \sum_i |I_{hkl, i} - \langle I_{hkl} \rangle| / \sum_{hkl} \langle I_{hkl} \rangle$ , <sup>b</sup> $\sigma(I)$  is the estimated standard deviation of the integrated intensity ( $I$ ). <sup>c</sup> $R_{factor} = \sum_{hkl} ||F_o| - |F_c|| / \sum_{hkl} |F_o|$  for all data except 5%, which were used for  $R_{free}$  calculation. Highest resolution shell is shown in parenthesis.

Supplementary Table 2: Contacts between the BC8B TCR and CD1b-PC

| TCR Gene      | TCR Residue                        | CD1b                                                     | Bond Type |
|---------------|------------------------------------|----------------------------------------------------------|-----------|
| CDR1 $\alpha$ | Tyr36                              | Gln152, Gly153,<br>Glu156,                               | VDW       |
| CDR2 $\alpha$ | Lys58-C $\beta$                    | Gln152-N $\epsilon$ 2                                    | VDW       |
| CDR3 $\alpha$ | Ser109-O $\gamma$                  | G153-C $\alpha$                                          | VDW       |
| CDR3 $\alpha$ | Tyr113-OH                          | Arg79-NH1, Glu80-<br>O $\epsilon$ 2                      | HB        |
| CDR3 $\alpha$ | Tyr113                             | Val72, Phe75,<br>Gly76, Arg79,<br>Glu80                  | VDW       |
| CDR3 $\alpha$ | Gln114-N $\epsilon$ 2              | Val72                                                    | VDW       |
| CDR3 $\alpha$ | Gln114                             | Glu68, Val72                                             | VDW       |
| CDR1 $\beta$  | Glu37-O $\epsilon$ 2               | Phe75, Arg79                                             | VDW       |
| CDR1 $\beta$  | Tyr38-OH                           | Phe75                                                    | VDW       |
| CDR2 $\beta$  | Val57-C $\gamma$ 2                 | Arg71-C $\delta$                                         | VDW       |
| CDR3 $\beta$  | Met108-S $\delta$                  | Arg79-NH1                                                | HB        |
| CDR3 $\beta$  | Pro109-O                           | Arg79-NH2                                                | HB        |
| CDR3 $\beta$  | Pro109                             | Arg79                                                    | VDW       |
| CDR3 $\beta$  | Gly110                             | Arg79, Glu80                                             | VDW       |
| CDR3 $\beta$  | Leu111-N                           | Glu80-O $\epsilon$ 2                                     | HB        |
| CDR3 $\beta$  | Leu111                             | Glu80, Tyr151,<br>Ile154                                 | VDW       |
| CDR3 $\beta$  | Arg112.1-NH1-NH2                   | Asp87-O $\delta$ 1-O $\delta$ 2,<br>Asp83-O $\delta$ 2-O | SB, HB    |
| CDR3 $\beta$  | Arg112.1                           | Asp83, Phe84,<br>Asp87, Tyr151                           | VDW       |
| TCR Gene      | TCR Residue                        | PC                                                       | Bond Type |
| CDR1 $\alpha$ | Thr28-C $\beta$                    | C6                                                       | VDW       |
| CDR1 $\alpha$ | Gly29                              | O2P                                                      | VDW       |
| CDR1 $\alpha$ | Tyr36-N-O                          | O2P, O1P                                                 | HB        |
| CDR1 $\alpha$ | Tyr36                              | O1P                                                      | VDW       |
| CDR1 $\alpha$ | Pro37-N                            | O1P                                                      | HB        |
| CDR3 $\alpha$ | Pro108-C-C $\beta$ -C $\gamma$     | C1, C4-C7, C7,<br>O1P, O3P, P                            | VDW       |
| CDR3 $\alpha$ | Ser109-N-O                         | O1P, O2-O31                                              | HB        |
| CDR3 $\alpha$ | Tyr113-C $\delta$ 2-C $\epsilon$ 2 | C32, C34                                                 | VDW       |
| CDR3 $\beta$  | Leu111-C $\delta$ 2                | C32, O31                                                 | VDW       |

VDW: Van der Waals interaction (cut-off of 4.0 Å), HB: Hydrogen Bond (Cut-off of 3.5 Å), SB: Salt Bridge (cut-off of 3.5 Å)

Corresponding Author Name: \_\_\_\_\_

Manuscript Number: \_\_\_\_\_

## Reporting Checklist For Nature Communications Life Sciences Articles

This checklist is used to ensure good reporting standards and to improve the reproducibility of published results. For more information, please read [Reporting Life Sciences Research](#).

### ▶ Figure legends

Check here to confirm that the following information is available in all relevant figure legends (or Methods section if too long):

- the **exact sample size (n)** for each experimental group/condition, given as a number, not a range;
- a **description of the sample collection** allowing the reader to understand whether the samples represent **technical or biological replicates** (including how many animals, litters, culture, etc.);
- a **statement of how many times the experiment shown was replicated in the laboratory**;
- **definitions of statistical methods and measures:** (For small sample sizes ( $n < 5$ ) descriptive statistics are not appropriate, instead plot individual data points)
  - very common tests, such as  $t$ -test, simple  $\chi^2$  tests, Wilcoxon and Mann-Whitney tests, can be unambiguously identified by name only, but more complex techniques should be described in the methods section;
  - are tests one-sided or two-sided?
  - are there adjustments for multiple comparisons?
  - **statistical test results**, e.g., **P values**;
  - definition of '**center values**' as **median** or **mean**;
  - definition of **error bars** as **s.d.** or **s.e.m.** or **c.i.**

This checklist will not be published. Please ensure that the answers to the following questions are reported in the manuscript itself. We encourage you to include a specific subsection in the Methods section for statistics, reagents and animal models. Below, provide the page number or section and paragraph number (e.g. "Page 5" or "Methods, 'reagents' subsection, paragraph 2").

### ▶ Statistics and general methods \_\_\_\_\_ Reported in section/paragraph or page #: \_\_\_\_\_

1. How was the sample size chosen to ensure adequate power to detect a pre-specified effect size? (Give section/paragraph or page #)

For animal studies, include a statement about sample size estimate even if no statistical methods were used.

2. Describe inclusion/exclusion criteria if samples or animals were excluded from the analysis. Were the criteria pre-established? (Give section/paragraph or page #)
3. If a method of randomization was used to determine how samples/animals were allocated to experimental groups and processed, describe it. (Give section/paragraph or page #)

For animal studies, include a statement about randomization even if no randomization was used.

4. If the investigator was blinded to the group allocation during the experiment and/or when assessing the outcome, state the extent of blinding. (Give section/paragraph or page #)

For animal studies, include a statement about blinding even if no blinding was done.

5. For every figure, are statistical tests justified as appropriate?

Do the data meet the assumptions of the tests (e.g., normal distribution)?

Is there an estimate of variation within each group of data?

Is the variance similar between the groups that are being statistically compared? (Give section/paragraph or page #)



**► Reagents**

Reported in section/paragraph or page #: \_\_\_\_\_

6. To show that antibodies were profiled for use in the system under study (assay and species), provide a citation, catalog number and/or clone number, supplementary information or reference to an antibody validation profile (e.g., [Antibodypedia](#), [1DegreeBio](#)).
7. Cell line identity:
  - a. Are any cell lines used in this paper listed in the database of commonly misidentified cell lines maintained by [ICLAC](#) (also available in [NCBI Biosample](#))?
  - b. If yes, include in the Methods section a scientific justification of their use – indicate here on which page (or section and paragraph) the justification can be found.
  - c. For each cell line, include in the Methods section a statement that specifies:
    - the source of the cell lines
    - have the cell lines been authenticated? If so, by which method?
    - have the cell lines been tested for mycoplasma contamination?In this checklist, indicate on which page (or section and paragraph) the information can be found.

**► Animal Models**

Reported in section/paragraph or page #: \_\_\_\_\_

8. Report species, strain, sex and age of animals
9. For experiments involving live vertebrates, include a statement of compliance with ethical regulations and identify the committee(s) approving the experiments.
10. We recommend consulting the ARRIVE guidelines ([PLoS Biol. 8\(6\), e1000412,2010](#)) to ensure that other relevant aspects of animal studies are adequately reported.

**► Human subjects**

Reported in section/paragraph or page #: \_\_\_\_\_

11. Identify the committee(s) approving the study protocol.
12. Include a statement confirming that informed consent was obtained from all subjects.
13. For publication of patient photos, include a statement confirming that consent to publish was obtained.
14. Report the clinical trial registration number (at [ClinicalTrials.gov](#) or equivalent).
15. For phase II and III randomized controlled trials, please refer to the [CONSORT statement](#) and submit the CONSORT checklist with your submission.
16. For tumor marker prognostic studies, we recommend that you follow the [REMARK reporting guidelines](#).



**► Data Availability**

Reported in section/paragraph or page #

17. Provide a Data availability statement in the Methods section under "**Data availability**", which should include, where applicable:

- Accession codes for deposited data
- Other unique identifiers (such as DOIs and hyperlinks for any other datasets)
- At a minimum, a statement confirming that all relevant data are available from the authors
- Formal citations of datasets that are assigned DOIs
- A statement regarding data available with restrictions

See our [data availability and data citations policy page](#) for more information.

Data deposition in a public repository is mandatory for:

- a. Protein, DNA and RNA sequences
- b. Macromolecular structures
- c. Crystallographic data for small molecules
- d. Microarray data

Deposition is strongly recommended for many other datasets for which structured public repositories exist; more details on our data policy are available [here](#). We encourage the provision of other source data in supplementary information or in unstructured repositories such as [Figshare](#) and [Dryad](#). We encourage publication of Data Descriptors (see [Scientific Data](#)) to maximize data reuse

18. If computer code was used to generate results that are central to the paper's conclusions, include a statement in the Methods section under "**Code availability**" to indicate whether and how the code can be accessed. Include version information as necessary and any restrictions on availability.
